# Supplementary material
Source: PubMed Central journal article supplement (PMC4583071)
Supplement: cg5b00395_si_001.pdf [file cg5b00395_si_001.pdf]

# Electronic Supporting Information

## Control of Assembly of Dihydropyridyl and Pyridyl Molecules via Directed Hydrogen Bonding

*Jian Lü,<sup>†,‡</sup> Li-Wei Han,<sup>‡,§</sup> Nada H. Alsmail,<sup>†</sup> Alexander J. Blake,<sup>†</sup> William Lewis,<sup>†</sup> Rong Cao<sup>‡,\*</sup> and  
Martin Schröder<sup>†,\*</sup>*

<sup>‡</sup> State Key Laboratory of Structural Chemistry, Fujian Institute of Research on the Structure of Matter, Chinese Academy of Sciences, Fuzhou 350002 Fujian, P. R. China.

<sup>†</sup> School of Chemistry, University of Nottingham, University Park, Nottingham NG7 2RD, UK.

<sup>‡</sup> School of Chemistry, University of Manchester, Manchester, UK, M13 9PL

<sup>§</sup> School of Chemistry and Chemical Engineering, Nantong University, Nantong 226019 Jiangsu, P. R. China.

**Table S1.** Hydrogen bond lengths in compounds **1-4**.

| Compound | Hydrogen Bond (Å)  |                    |                      |
|----------|--------------------|--------------------|----------------------|
|          | N-H...N            | N-H...O            | C-H...N              |
| <b>1</b> |                    | 1.930(2); 2.809(3) | 2.502(5); 3.335(7)   |
|          |                    | 1.939(4); 2.818(2) | 2.621(5); 3.357(7)   |
|          |                    |                    | 2.666(5); 3.500(8)   |
|          |                    |                    | 2.775(6); 3.603(9)   |
| <b>2</b> |                    |                    | 2.569(4); 2.820(1)   |
|          |                    |                    | 2.572(10); 3.397(18) |
|          |                    |                    | 2.622(14); 2.863(18) |
|          |                    |                    | 2.990(4); 3.956(4)   |
| <b>3</b> | 2.060(1); 2.903(1) |                    | 2.571(2); 3.365(2)   |
|          | 2.203(1); 2.903(1) |                    | 2.687(1); 3.583(1)   |
| <b>4</b> |                    |                    | 2.583(7); 3.487(9)   |
|          |                    |                    | 2.774(7); 3.69(1)    |
|          |                    |                    | 3.013(8); 3.907(10)  |

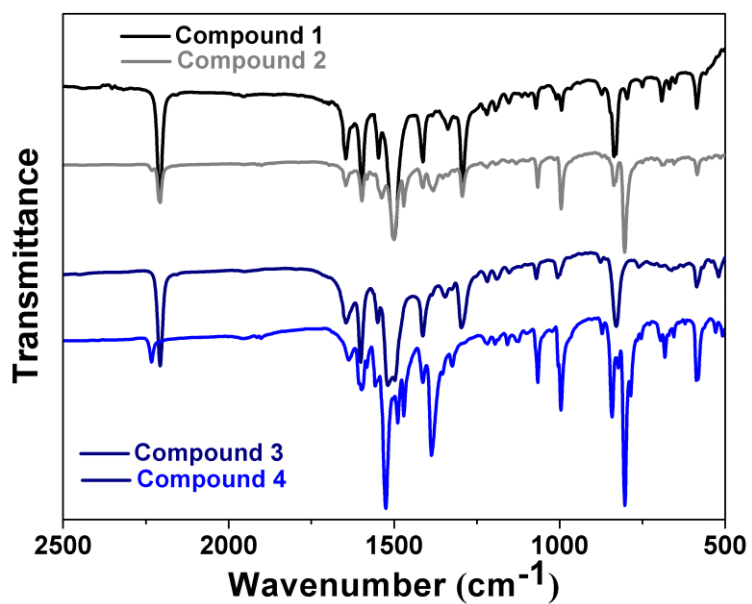

Figure S1. IR spectra of compounds 1-4.

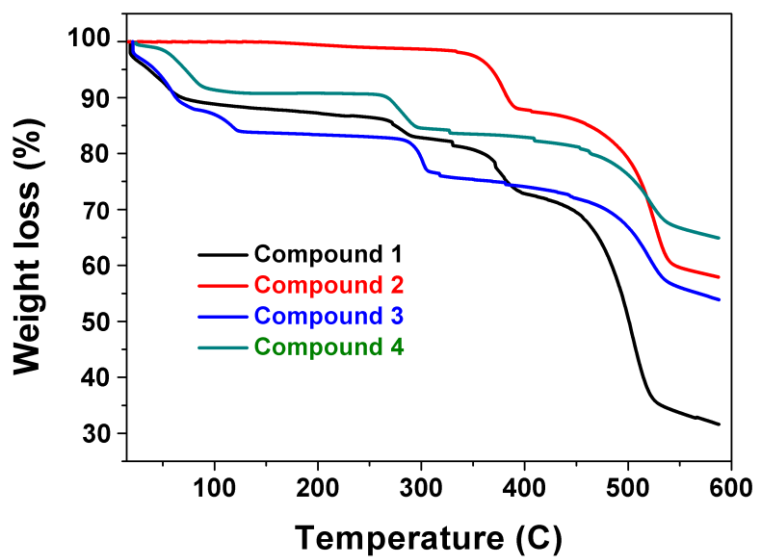

Figure S2 TGA plots of compounds 1-4.

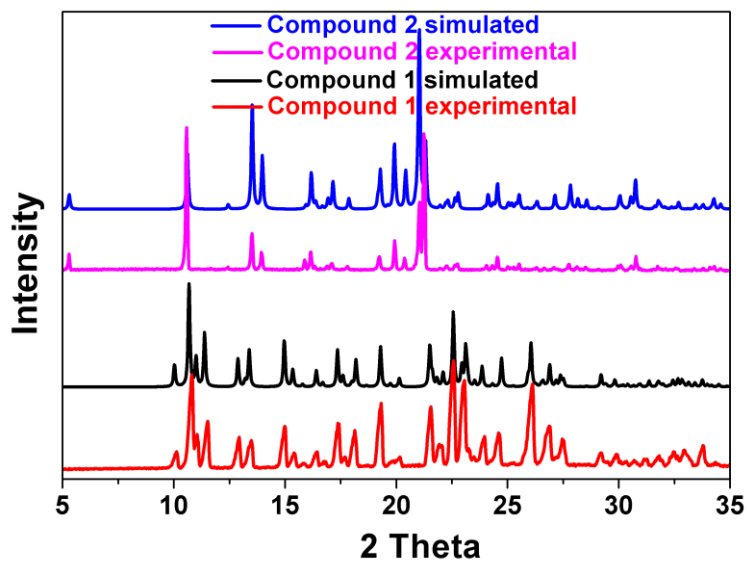

Figure S3 PXR D plots of compounds 1 and 2.

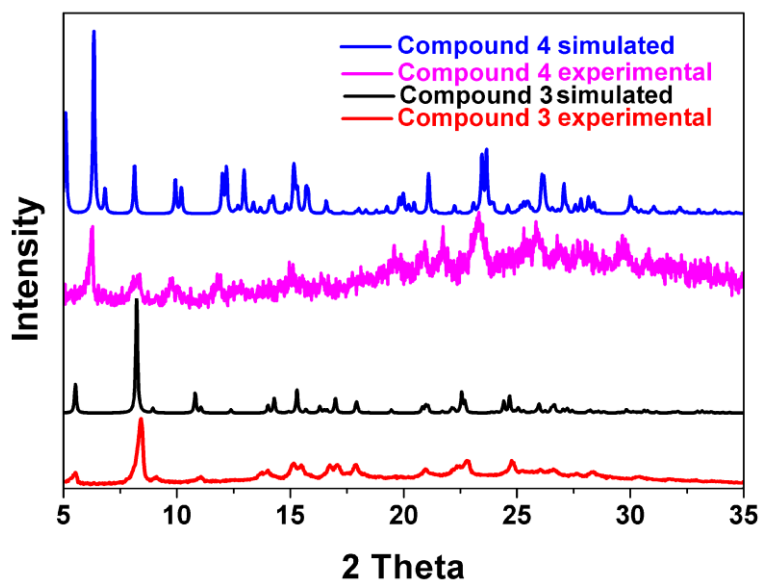

Figure S4 PXR D plots of compounds 3 and 4.

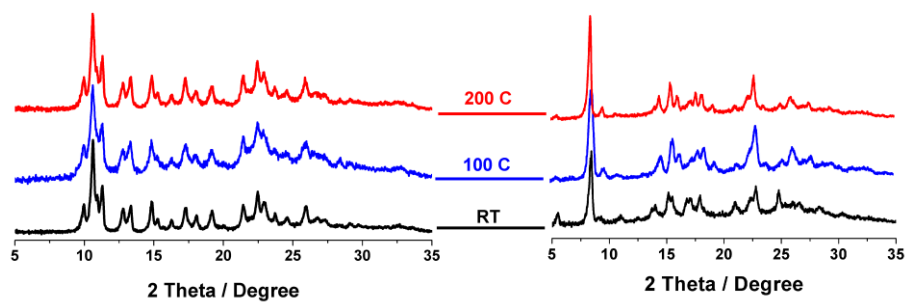

**Figure S5** PXR D patterns of **1** (left) and **3** (right) as a function of temperature.
